# Supplementary material for: One-step, efficient and sustainable microwave-assisted biodiesel production using a sulfonated porous organic polymer catalyst
Source: Royal Society of Chemistry journal article supplement (doi:10.1039/d5ra07846f), 2025-01-01
Supplement: d5ra07846f1.pdf [file d5ra07846f1.pdf]

## Supplementary Information

### One-Step, Efficient and Sustainable Microwave-Assisted Biodiesel Production Using a Sulfonated Porous Organic Polymer Catalyst

Biman Kaushik<sup>a</sup>, Shikhasmita Das<sup>a</sup>, Sanjay Basumatary<sup>b</sup>, Ruma Rano<sup>a</sup>, Hui Li<sup>c</sup>, Jasha Momo H. Anal<sup>d</sup>, Gopinath Halder<sup>e</sup>, Samuel Lalthazuala Rokhum<sup>a\*</sup>

<sup>a</sup> Department of Chemistry, National Institute of Technology Silchar, Silchar 788010, Assam, India

<sup>b</sup> Department of Chemistry, Bodoland University, Kokrajhar, 783370, Assam, India

<sup>c</sup> School of Thermal Engineering, Shandong Jianzhu University, Jinan 250101, PR China

<sup>d</sup> Natural Products and Medicinal Chemistry Division, CSIR-Indian Institute of Integrative Medicine, Jammu, Jammu and Kashmir, 180001 India

<sup>e</sup> Department of Chemical Engineering, National Institute of Technology Durgapur, Durgapur 713209, West Bengal, India

Corresponding author's email: [rokhum@che.nits.ac.in](mailto:rokhum@che.nits.ac.in) (SLR)

| Sl. No | Caption                                                                                                                        | Figures  |
|--------|--------------------------------------------------------------------------------------------------------------------------------|----------|
| 1      | BET and pore size distribution of recovered catalyst                                                                           | Fig. S1  |
| 2      | Mass spectra of bio-diesel (methyl oleate)                                                                                     | Fig. S2  |
| 3      | Reaction parameters influence on biodiesel conversion                                                                          | Fig. S3  |
| 4      | SEM-EDS spectrum of reused catalyst                                                                                            | Fig. S4  |
| 5      | Single-factor optimization of biodiesel using CTF-POP-SO <sub>3</sub> H catalyst.                                              | Table S1 |
| 6      | General plausible mechanism of esterification of oleic acid                                                                    | Fig. S5  |
| 7      | An expansion of the $\alpha$ -CH <sub>2</sub> region showing triplets due to minor residual starting material (OA) at 2.37 ppm | Fig. S6  |
| 8      | Cost of catalyst for 1 kg biodiesel                                                                                            | Table S2 |
| 9      | Cost of 1 kg biodiesel from oleic acid by using microwave irradiation                                                          | Table S3 |

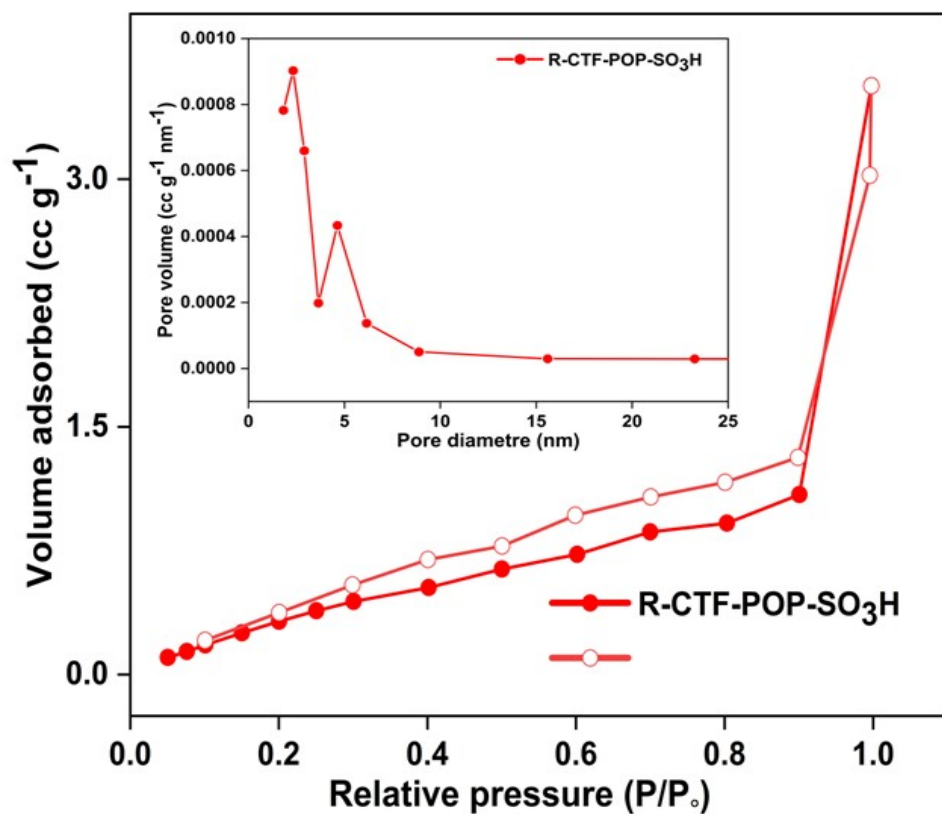

**Fig. S1:** BET and pore size distribution of recovered catalyst (R-CTF-POP-SO<sub>3</sub>H)

17

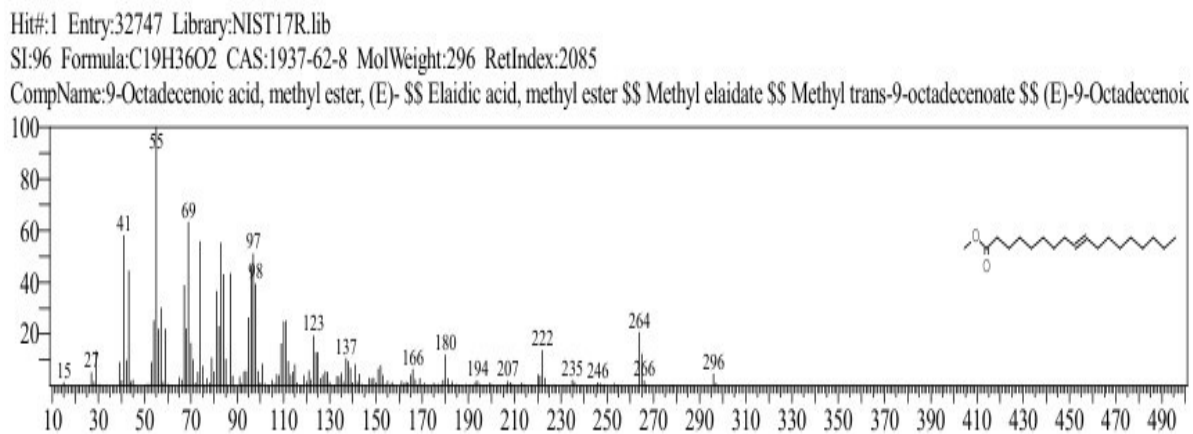

**Fig. S2:** Mass spectra of biodiesel (methyl oleate) eluted under optimized conditions.

18

19

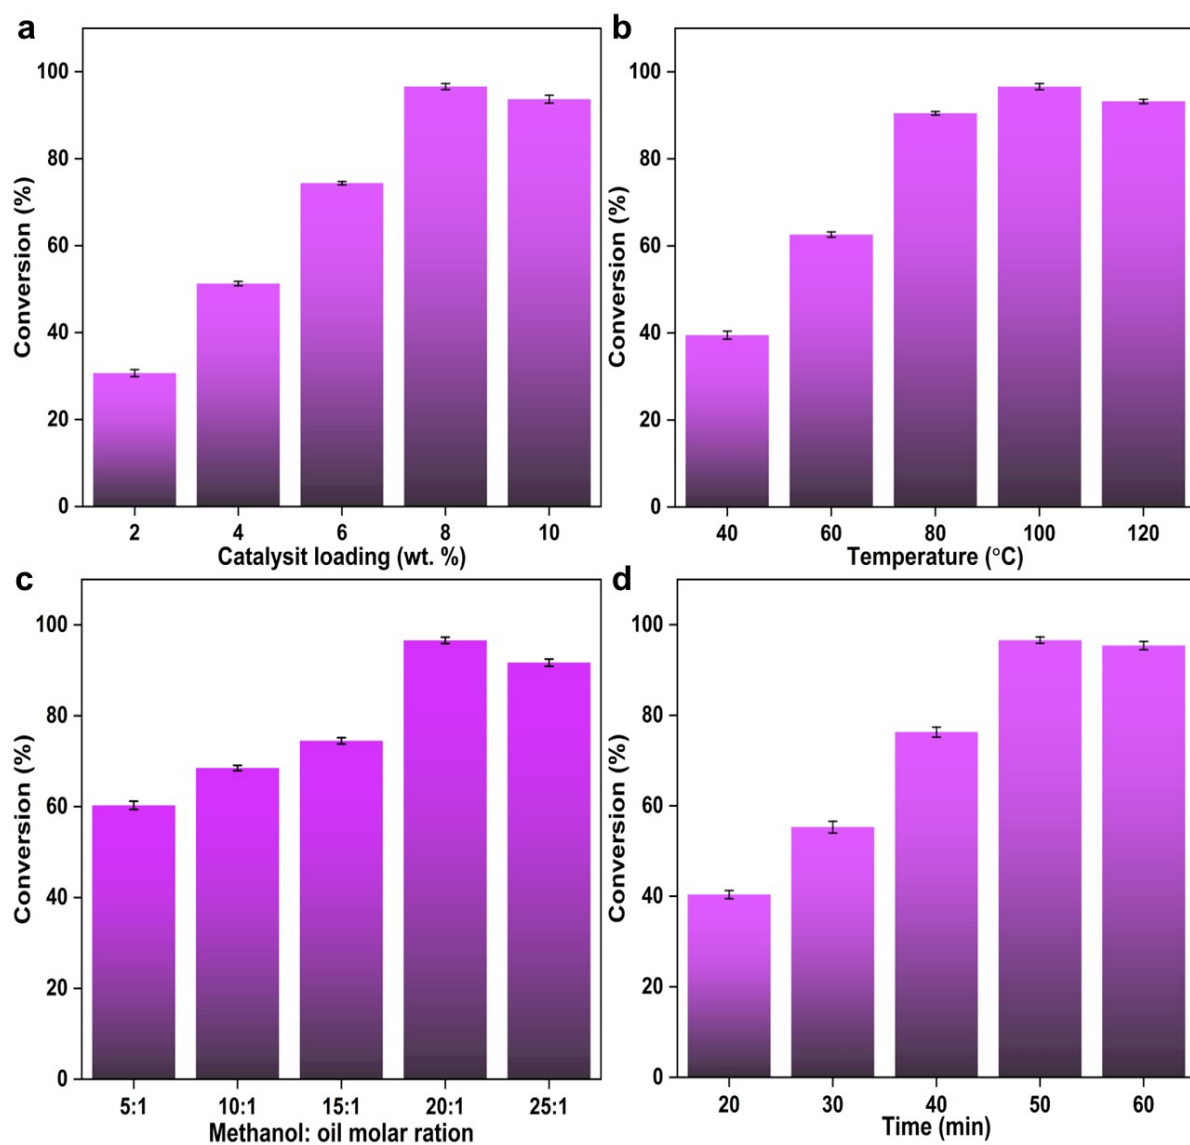

**Fig S3:** Reaction parameters influence on biodiesel conversion-(a) Catalyst loading, (b) Temperature, (c)MOMR, (d) reaction time.

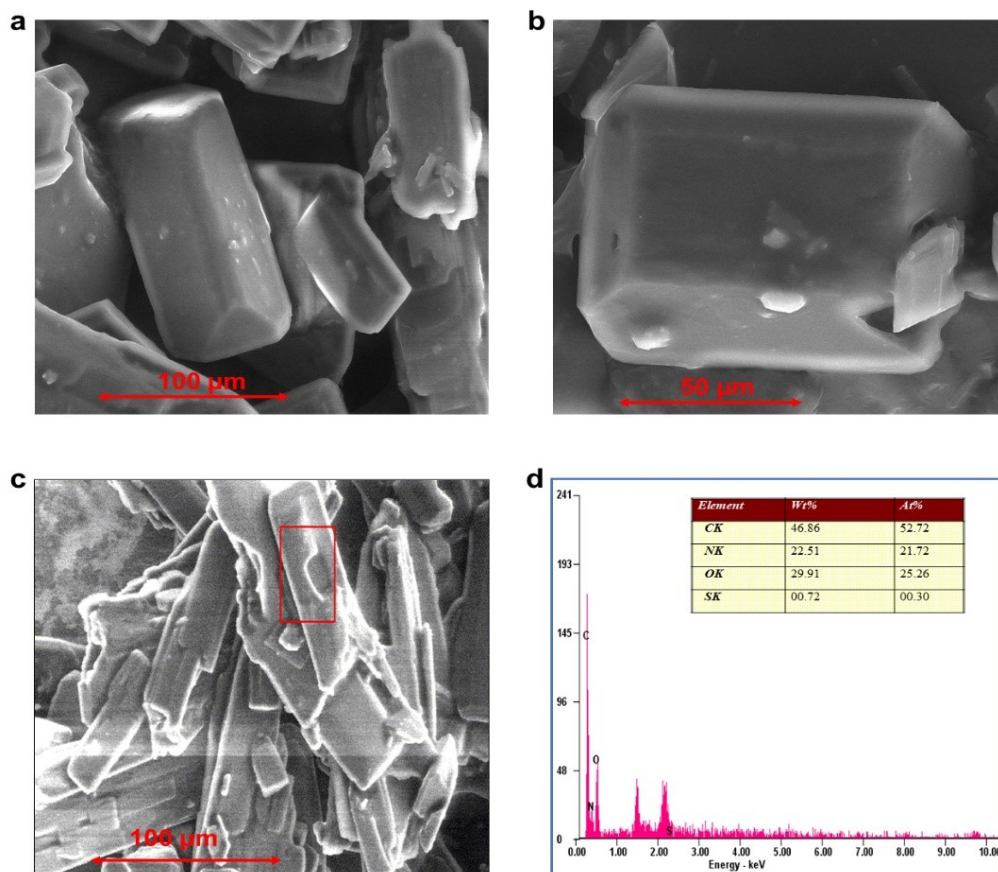

**Fig. S4:** SEM images of (a-c) recovered catalyst R-CTF-POP-SO<sub>3</sub>H along with the EDX data (d) for the region highlighted in the red box in (c).

**Table S1.** Single-factor optimization of biodiesel using CTF-POP-SO<sub>3</sub>H catalyst.

| Catalyst loading<br>(wt. %) | Temperature<br>(°C) | Methanol to Oil<br>Ratio | Time (min) | Conversion<br>(%) |
|-----------------------------|---------------------|--------------------------|------------|-------------------|
| 2                           | 100                 | 20:1                     | 50         | 30.7 ± 0.8        |
| 4                           | 100                 | 20:1                     | 50         | 51.3 ± 0.5        |
| 6                           | 100                 | 20:1                     | 50         | 74.4 ± 0.4        |
| 8                           | 100                 | 20:1                     | 50         | 96.6 ± 0.7        |
| 10                          | 100                 | 20:1                     | 50         | 93.7 ± 0.9        |
| 8                           | 40                  | 20:1                     | 50         | 39.5 ± 0.9        |
| 8                           | 60                  | 20:1                     | 50         | 62.6 ± 0.6        |
| 8                           | 80                  | 20:1                     | 50         | 90.5 ± 0.4        |
| 8                           | 100                 | 20:1                     | 50         | 96.6 ± 0.7        |
| 8                           | 120                 | 20:1                     | 50         | 93.2 ± 0.5        |
| 8                           | 100                 | 5:1                      | 50         | 60.3 ± 0.9        |
| 8                           | 100                 | 10:1                     | 50         | 68.5 ± 0.6        |
| 8                           | 100                 | 15:1                     | 50         | 74.5 ± 0.7        |

|   |     |      |    |            |
|---|-----|------|----|------------|
| 8 | 100 | 20:1 | 50 | 96.6 ± 0.7 |
| 8 | 100 | 25:1 | 50 | 91.7 ± 0.8 |
| 8 | 100 | 20:1 | 20 | 40.4 ± 0.9 |
| 8 | 100 | 20:1 | 30 | 55.3 ± 1.3 |
| 8 | 100 | 20:1 | 40 | 76.3 ± 1.1 |
| 8 | 100 | 20:1 | 50 | 96.6 ± 0.7 |
| 8 | 100 | 20:1 | 60 | 95.4 ± 0.9 |

33

$$Mean(\hat{x}) = \frac{\sum x_i}{n} \quad \text{Eq. S1}$$

$$SD = \sqrt{\frac{\sum (x_i - \bar{x})^2}{n - 1}} \quad \text{Eq. S2}$$

34 where n = no of experiments.  $x_i$ = each value.  $\bar{x}$  = mean for one optimized parametre.

35 SD = Standard Deviation

36 At the optimum condition (8 wt % catalyst loading, 100 °C temperature, 20: 1 MOMR, 50 min  
37 reaction time), the reaction was performed three times. So, for this we got 96.6 % mean and  
38 0.7 % standard deviation.

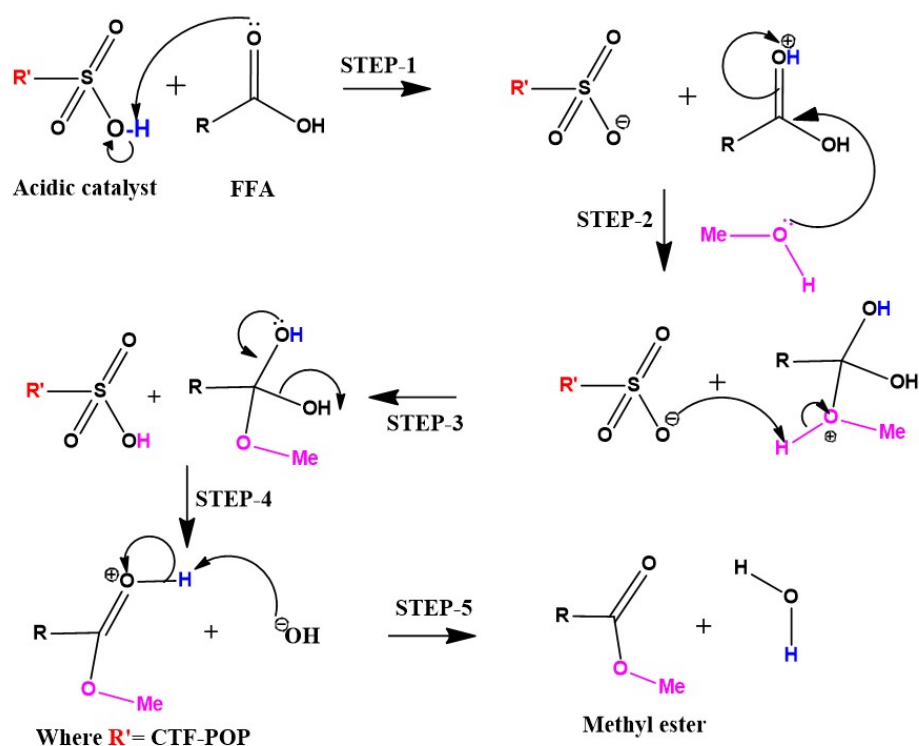

**Fig. S5:** Esterification of free fatty acid (oleic acid) to methyl ester (methyl oleate).

### 39 Mechanistic pathway:

40 The plausible reaction mechanism for the microwave-assisted esterification of oleic acid with  
 41 methanol using CTF-POP-SO<sub>3</sub>H as catalyst is illustrated in **Fig. S5** and proceeds through the  
 42 following elementary steps:

#### 43 1. Activation of Oleic Acid:

44 The Brønsted acidic -SO<sub>3</sub>H sites of the CTF-POP-SO<sub>3</sub>H catalyst protonate the carbonyl  
 45 oxygen of oleic acid (R-COOH), thereby increasing the electrophilicity of the carbonyl  
 46 carbon.

#### 47 2. Activation of Methanol and nucleophilic attack:

48 Methanol is activated through hydrogen bonding and subsequently attacks the  
 49 protonated carbonyl carbon to form a tetrahedral intermediate.

#### 50 3. Catalyst Regeneration:

51 The -SO<sub>3</sub>H site is regenerated by releasing the proton consumed in the first step.

#### 52 4. Proton Transfer and Water Elimination:

53 Step 4 and 5 involves proton transfer and the elimination of water, leading to the  
 54 formation of methyl ester, thus completing the catalytic cycle.

55 **Microwave-Assisted synergy:** Microwave irradiation speeds up the process by heating  
 56 the whole volume evenly via the dipolar rotation of methanol and the polarization of sulfonic  
 57 acid groups. This microwave-acidic-site synergy speeds up proton transfer and the creation of  
 58 intermediates, leading to full conversion in 50 minutes, which is much quicker than traditional  
 59 thermal approaches.

60

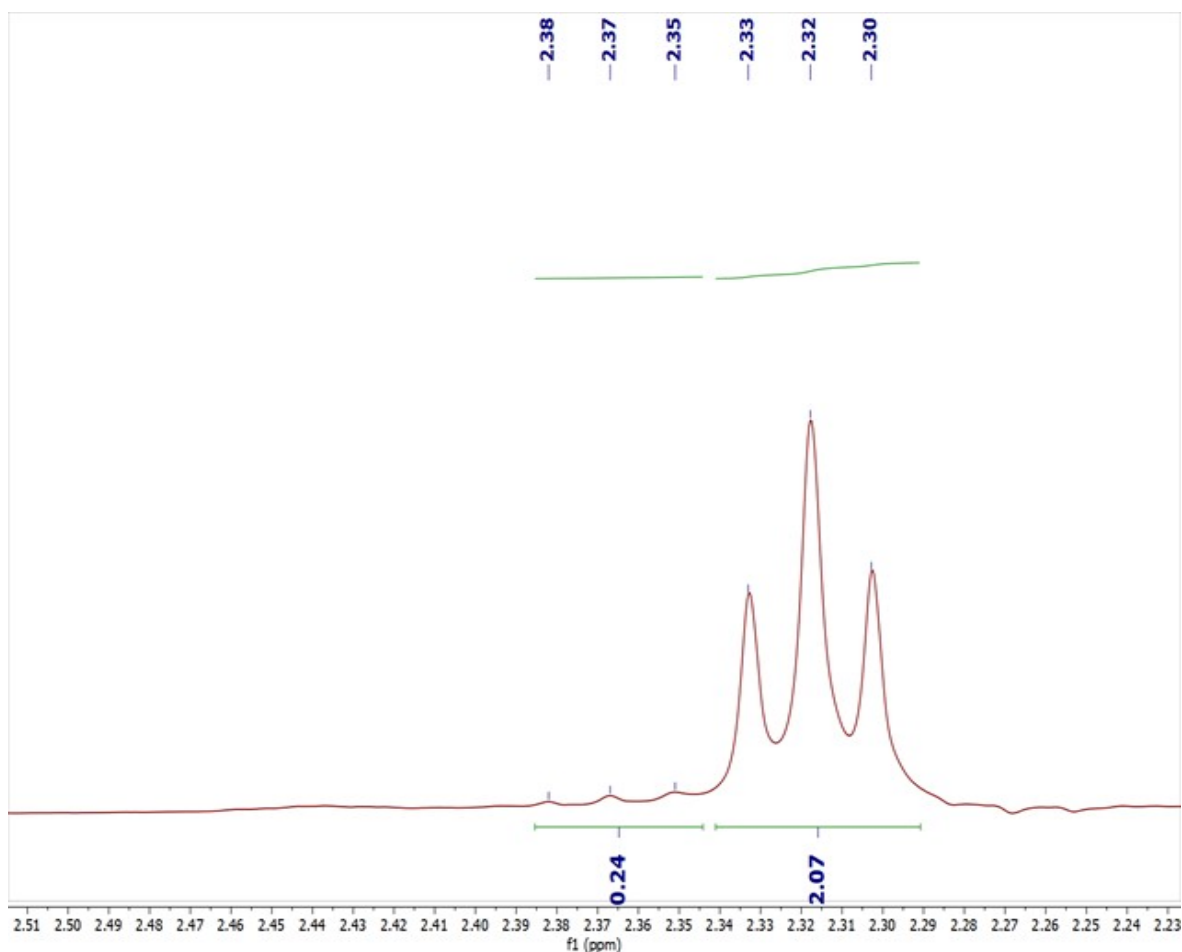

**Fig S6:** An expansion of the  $\alpha$ -CH<sub>2</sub> region showing triplets due to minor residual starting material (OA) at 2.37 ppm

**Table S2:** Cost of catalyst for 1 kg biodiesel

| SL. No. | Name of chemical            | Req. amount for 2.5 g catalyst | Req. amount for 77.1 g catalyst | <sup>a</sup> Unit price (USD) | Total price (USD) |
|---------|-----------------------------|--------------------------------|---------------------------------|-------------------------------|-------------------|
| 1       | Anhydrous AlCl <sub>3</sub> | 2.6 g                          | 80.184 g                        | 0.45/kg                       | 0.036             |



|    |                        |          |            |            |              |
|----|------------------------|----------|------------|------------|--------------|
| 2  | Cyanuric chloride      | 1 g      | 30.84 g    | 1.41/kg    | 0.043        |
| 3  | Triphenyl methane      | 1.3 g    | 40.092 g   | 1.13/kg    | 0.045        |
| 4  | DCM                    | 61 mL    | 1.881 L    | 0.37/L     | 0.696        |
| 5  | THF                    | 4 mL     | 123.36 mL  | 1.52/L     | 0.188        |
| 6  | Methanol               | 16 mL    | 493.44 mL  | 0.12/L     | 0.059        |
| 7  | Chlorosulphonic acid   | 1.5 mL   | 46.26 mL   | 1.09/L     | 0.05         |
| 8  | Electricity            | 1.5 unit | 46.26 unit | 0.055/unit | 2.544        |
| 9  | Total amount           |          |            |            | 3.661        |
| 10 | Reusability 5 cycles   |          |            |            | 3.661/5      |
| 11 | Total Cost of catalyst |          |            |            | <b>0.732</b> |

<sup>a</sup>Cost of raw materials are as per the purchased quotation price from Sisco research lab, BLD pharma, India Mart, Trade India, and Scientific global Guwahati, India. 1USD = 88.7 (Nov. 2025)

61

**Table S3:** Cost of 1 kg biodiesel from oleic acid by using microwave irradiation

| SL. NO | Process                                        | Description | Unit price (USD) | Cost (USD) |
|--------|------------------------------------------------|-------------|------------------|------------|
| 1      | Total amount of biodiesel production           | 1 kg        |                  |            |
| 2      | Cost of oleic acid feedstock                   | 967 g       | 0.96/1kg         | 0.92       |
| 3      | Methanol required for biodiesel                | 2.78 L      | 0.12/1L          | 0.33       |
| 4      | Electricity                                    | 0.04 unit   | 0.055/unit       | 0.002      |
| 5      | Quantity of catalyst needed for 1 kg biodiesel | 77.1 kg     |                  | 0.732      |

|       |                                  |              |
|-------|----------------------------------|--------------|
| 6     | Total cost                       | 1.984        |
|       | Overhead Cost    10 % net charge | 0.198        |
| <hr/> |                                  |              |
|       | Total cost for 1<br>kg biodiesel | <b>2.182</b> |
| <hr/> |                                  |              |

62
